# Supplementary material
Source: publisher figshare collection journal article supplement (https://acs.figshare.com/ndownloader/files/26802672)
Supplement: Supplementary file 1 [file 26802672]

## Electronic Supplementary Information

# Cocrystallization of an Antiretroviral Drug Nevirapine: An Eutectic, A Cocrystal Solvate, and A Cocrystal Hydrate

Indumathi Sathisaran<sup>1</sup> and Sameer Vishvanath Dalvi <sup>2,\*</sup>

<sup>1</sup>Biological Engineering and <sup>2</sup>Chemical Engineering, Indian Institute of Technology  
Gandhinagar, Palaj-382355, Gujarat, INDIA.

## I. SUPPLEMENTARY FIGURES

## II. SUPPLEMENTARY TABLES

## I. SUPPLEMENTARY FIGURES

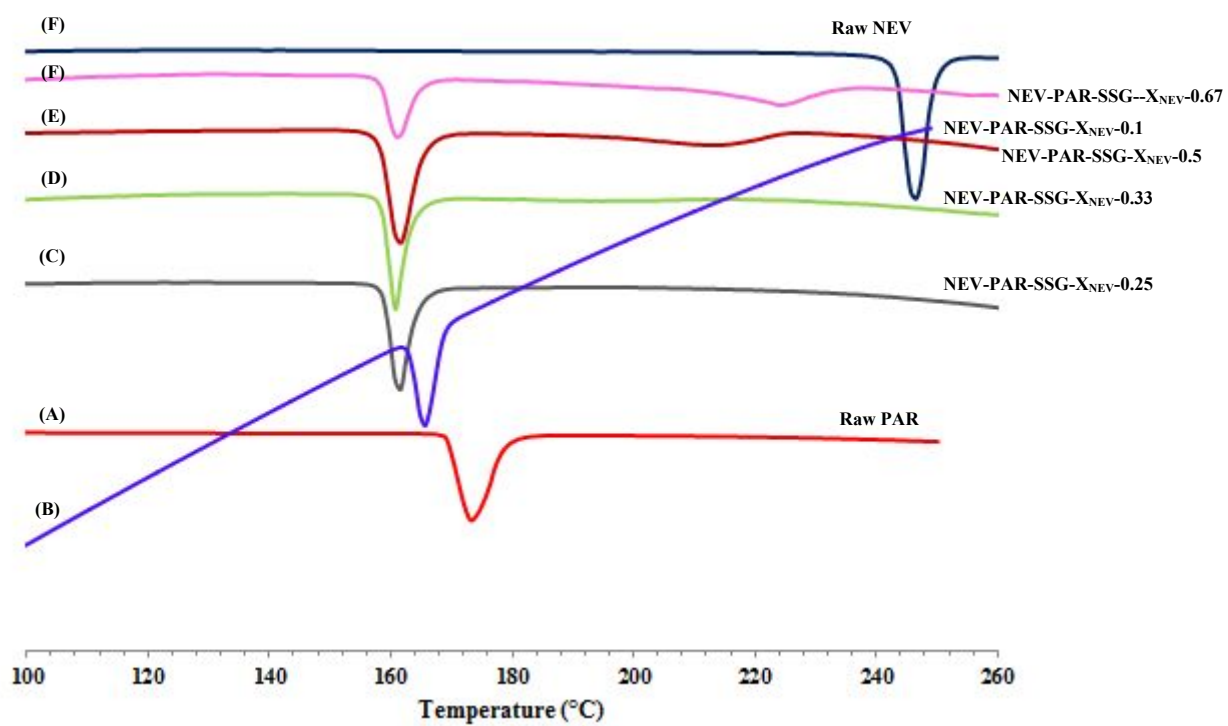

**Figure S1.** Overlay of DSC thermograms of various NEV-PAR-SSG mixtures (A) Raw PAR ( $X_{\text{NEV}}=0$ ), (B) NEV-PAR-SSG- $X_{\text{NEV}}=0.1$ , (C) NEV-PAR-SSG- $X_{\text{NEV}}=0.25$ , (D) NEV-PAR-SSG- $X_{\text{NEV}}=0.33$ , (E) NEV-PAR-SSG- $X_{\text{NEV}}=0.5$ , (F) NEV-PAR-SSG- $X_{\text{NEV}}=0.67$  and (G) Raw NEV( $X_{\text{NEV}}=1$ ).

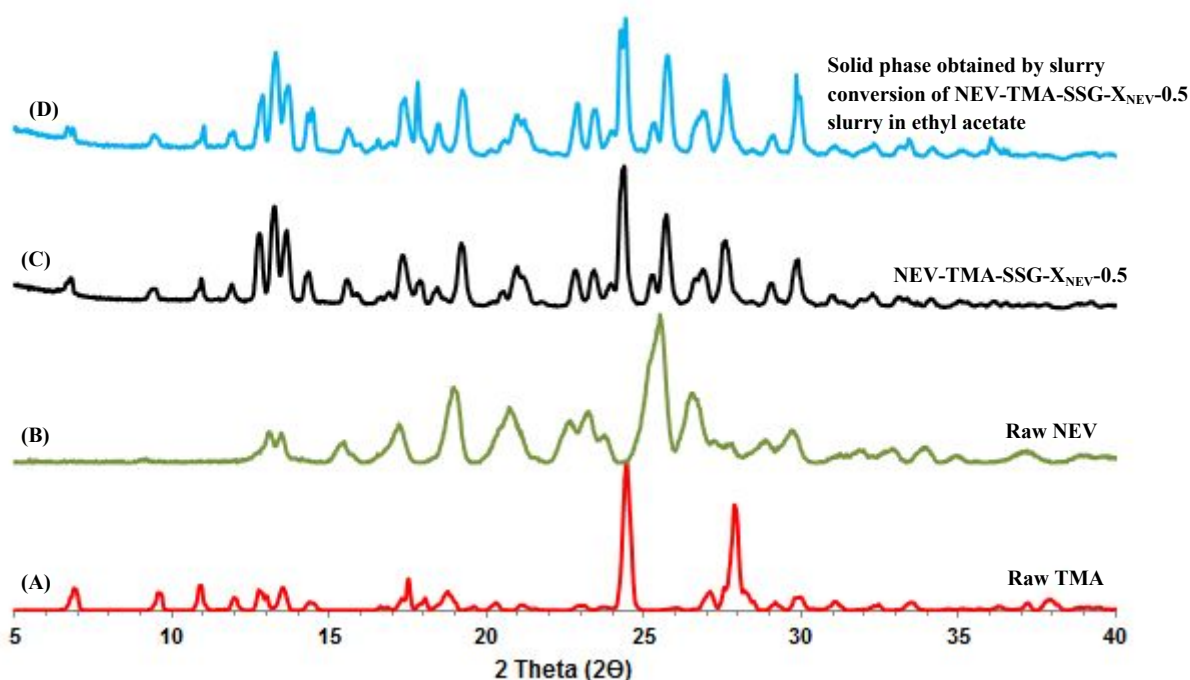

**Figure S2.** Overlay of PXRD patterns of (A) Raw TMA, (B) Raw NEV, (C) NEV-TMA-SSG- $X_{\text{NEV}}=0.5$  and (D) NEV solid phase obtained by slurry conversion of NEV-TMA-SSG- $X_{\text{NEV}}=0.5$  in ethyl acetate.

Response: The shape of the carbon atom in acetate functionality of NEV-TMEA methyl ester (1:1) cocrystal hydrate was not ideally shaped. However, it does not indicate incorrect atom assignment.

**Figure S3.** A snapshot of Alert level B observed in the CheckCIF report of NEV-TMEA methyl ester (1:1) cocrystal hydrate.

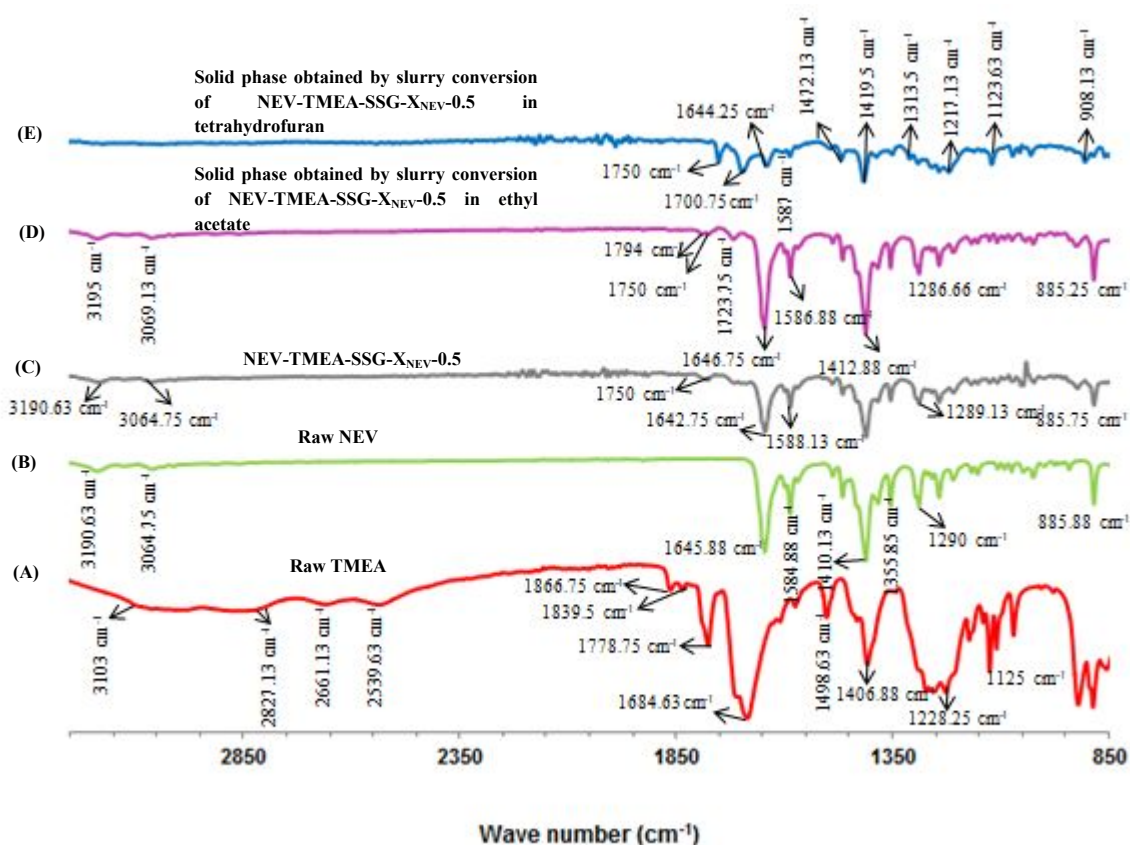

**Figure S4.** Overlay of FT-IR spectra of (A) Raw TMEA, (B) Raw NEV, (C) NEV-TMEA-SSG- $X_{\text{NEV}}=0.5$ , (D) Solid phase obtained by slurry conversion of NEV-TMEA-

SSG- $X_{\text{NEV}}-0.5$  in ethyl acetate and (E) Solid phase obtained by slurry conversion of

NEV-TMEA-SSG- $X_{\text{NEV}}-0.5$  in tetrahydrofuran.

## II. SUPPLEMENTARY TABLES

**Table S1.** Summary of literature reports available on NEV cocrystals/eutectics and its dissolution/solubility enhancement.

| S.No | Coformer                  | Cocrystal<br>Stoichiometry | Cocrystallization method                                                                   | Comments on dissolution/solubility<br>Enhancement/anti-viral activity                                                                                                      | Crystal<br>structure<br>reported | Reference(s) |
|------|---------------------------|----------------------------|--------------------------------------------------------------------------------------------|----------------------------------------------------------------------------------------------------------------------------------------------------------------------------|----------------------------------|--------------|
| 01.  | Saccharin                 | 2:1                        | Neat co-grinding, liquid-assisted (solvent-drop) grinding and co-precipitation in solvents | Nevirapine-saccharin (2:1) cocrystal showed 20-25% enhanced dissolution than raw nevirapine. Also, the cocrystal exhibited 1.4 times higher solubility than raw nevirapine | Yes                              | 1            |
| 02.  | Saccharin                 | 2:1                        | Reaction crystallization in 1-pentanol                                                     | Influence of pH on solubility of the cocrystal phase was investigated                                                                                                      | No                               | 2            |
| 03.  | Saccharin                 | 1: 1 and 2:1               | Liquid assisted grinding in grinding jar with stainless steel balls and slow evaporation   | Not reported                                                                                                                                                               | No                               | 3            |
| 03.  | <i>rac</i> -tartaric acid | 1:1                        | Neat co-grinding, liquid-assisted (solvent-drop) grinding and co-precipitation in solvents | Nevirapine-saccharin (2:1) cocrystal showed 10-15% enhanced dissolution than raw nevirapine. The cocrystal                                                                 | Yes                              | 1            |

|     |                |     |                                                                                            |                                                                                                                                                                                      |     |   |  |
|-----|----------------|-----|--------------------------------------------------------------------------------------------|--------------------------------------------------------------------------------------------------------------------------------------------------------------------------------------|-----|---|--|
|     |                |     |                                                                                            | exhibited 1.2 times higher solubility than raw nevirapine                                                                                                                            |     |   |  |
| 04. | Maleic acid    | 1:1 | Neat co-grinding, liquid-assisted (solvent-drop) grinding and co-precipitation in solvents | Nevirapine-maleic acid cocrystal exhibited five-fold increase in the aqueous solubility of nevirapine. Also, the cocrystal exhibited 5.3 times higher solubility than raw nevirapine | Yes | 1 |  |
| 05. | Maleic acid    | 1:1 | Reaction crystallization in chloroform                                                     | Effect of pH on solubility of the cocrystal phase was studied                                                                                                                        | No  | 2 |  |
| 06. | Glutaric acid  | 1:1 | Neat co-grinding, liquid-assisted (solvent-drop) grinding and co-precipitation in solvents | The cocrystal exhibited 1.2 times higher solubility than raw nevirapine                                                                                                              | Yes | 1 |  |
| 07. | Salicylic acid | 2:1 | Neat co-grinding, liquid-assisted (solvent-drop) grinding and co-precipitation in solvents | The cocrystal exhibited 1.1 times higher solubility than raw nevirapine                                                                                                              | Yes | 1 |  |
| 08. | Salicylic acid | 2:1 | Reaction crystallization in chloroform                                                     | Influence of pH on solubility of the cocrystal phase was studied                                                                                                                     | No  | 2 |  |
| 09. | Salicylic acid |     | Liquid assisted grinding in grinding jar with stainless steel balls and slow evaporation   | Not reported                                                                                                                                                                         | No  | 3 |  |
| 09. | 1,2,4,5-       | 1:1 | Slow evaporation                                                                           | Not reported                                                                                                                                                                         | Yes | 4 |  |

|     |                               |             |                                                                                          |                                                                                                                                                       |                   |   |
|-----|-------------------------------|-------------|------------------------------------------------------------------------------------------|-------------------------------------------------------------------------------------------------------------------------------------------------------|-------------------|---|
|     | tetrafluoro-3,6-diiodobenzene |             |                                                                                          |                                                                                                                                                       |                   |   |
| 10. | 1,3-diiodobenzene             | 2:1         | Slow evaporation                                                                         | Not reported                                                                                                                                          | Yes               | 4 |
| 11. | 3-hydroxybenzoic acid         | 1:1 and 2:1 | Liquid assisted grinding in grinding jar with stainless steel balls and slow evaporation | Not reported                                                                                                                                          | No                | 3 |
| 12. | 4-hydroxybenzoic acid         | 1:1 and 2:1 | Liquid assisted grinding in grinding jar with stainless steel balls and slow evaporation | Not reported                                                                                                                                          | Yes               | 3 |
| 13. | Theophylline                  | 1:1 and 2:1 | Liquid assisted grinding in grinding jar with stainless steel balls and slow evaporation | Intrinsic dissolution profile shows that the cocrystal exhibits 5 times higher dissolution than raw NEV in 0.1 N Hcl and water as dissolution medium  | No                | 3 |
| 14. | Caffeine                      | 1:1 and 2:1 | Liquid assisted grinding in grinding jar with stainless steel balls and slow evaporation | Intrinsic dissolution profile shows that the cocrystal exhibits 10 times higher dissolution than raw NEV in 0.1 N Hcl and water as dissolution medium | No                | 3 |
| 15. | Urea                          | 1:1 and 2:1 | Liquid assisted grinding in grinding jar with stainless steel balls and slow evaporation | Not reported                                                                                                                                          | An eutectic phase | 3 |
| 16. | Saccharin, rac-               | 1:1         | Hot-Stage microscopy was used                                                            | The dissolution of nevirapine cocrystals                                                                                                              | No                | 5 |



|     |                                                                          |                                                                                                                                                                                                       |                                                                                                                                                                                                                                                                                                                                                                                                                               |    |   |
|-----|--------------------------------------------------------------------------|-------------------------------------------------------------------------------------------------------------------------------------------------------------------------------------------------------|-------------------------------------------------------------------------------------------------------------------------------------------------------------------------------------------------------------------------------------------------------------------------------------------------------------------------------------------------------------------------------------------------------------------------------|----|---|
|     | tartaric acid,<br>maleic acid,<br>salicylic acid<br>and glutaric<br>acid | for determining the purity of the<br>cocrystal. The fourier transform -<br>infra red spectroscopy was used<br>as an analytical method to identify<br>cocrystal formation.                             | was increased in presence of coformers<br>in the cocrystal as well as in the physical<br>mixture.<br><br>The nevirapine-glutaric acid (1:1)<br>cocrystal was the only cocrystal that<br>yielded better dissolution than the<br>physical mixture.<br><br>The nevirapine cocrystals prepared with<br>saccharin, salicylic acid, maleic acid and<br>glutaric acid exhibited improved anti-viral<br>activity than raw nevirapine. |    |   |
| 17. | Series of 30 -<br>coformers                                              | Two different structure-informatics<br>methods namely Hydrogen-bond<br>propensity (HBP) and hydrogen-<br>bond coordination (HBC), and one<br>approach based on hydrogen-<br>bond interaction energies | Not reported                                                                                                                                                                                                                                                                                                                                                                                                                  | No | 6 |

**Table S2.** Summary of different NEV solid forms obtained by evaporative crystallization of NEV-TMA-SSG- $X_{\text{NEV}}=0.5$  in different solvent systems.

| Cocrystallization method                  | Product other than cocrystal   | Cocrystal form (solid powders/crystal)       | Confirmation technique adopted |
|-------------------------------------------|--------------------------------|----------------------------------------------|--------------------------------|
| Methanol                                  | 1:1 cocrystal methanol solvate | plate-like transparent crystals              | PXRD and SCXRD                 |
| Acetone-Toluene (1:1 volume ratio)        | NEV                            | rod-like transparent crystals                | SCXRD                          |
| Ethyl acetate-Toluene (1:1 volume ratio)  | NEV and NEV hemihydrate        | plate like and rod-like crystals             | SCXRD                          |
| Ethyl acetate                             | NEV hemihydrate                | aggregates of rod-like crystals              | SCXRD                          |
| Tetrahydrofuran                           | NEV                            | rod-like transparent crystals                | PXRD                           |
| Acetonitrile-Methanol (1:1 volume ratio)  | NEV hemihydrate                | plate-like transparent crystals              | SCXRD                          |
| Ethyl acetate-Methanol (1:1 volume ratio) | NEV and NEV hemihydrate        | rod-like and plate-like transparent crystals | SCXRD                          |
| Methanol-Toluene (1:1 volume ratio)       | NEV                            | rod-like transparent crystals                | SCXRD                          |

## REFERENCES

(1) Caira, M. R.; Bourne, S. A.; Samsodien, H.; Engel, E.; Liebenberg, W.; Stieger, N.; Aucamp, M. Co-crystals of the antiretroviral nevirapine: crystal structures, thermal analysis and dissolution behavior. *CrystEngComm* **2012**, 14, 2541-2551.

(2) Kuminek, G.; Rodriguez-Hornedo, N.; Siedler, S.; Rocha, H. V.; Cuffini, S. L.; Cardoso, S. G. How cocrystals of weakly basic drugs and acidic coformers might modulate solubility and stability. *ChemCommun.* **2016**, 52(34), 5832-5835.

(3) Costa, R. N.; Reviglio, A. L.; Siedler, S.; Cardoso, S. G.; Linck, Y. G.; Monti, G. A.; Carvalho, A. M. G.; Resende, J. A. L. C.; Chaves, M. H. C.; Rocha, H. V. A.; Choquesillo-Lazarte, D.; Infantes, L.; Cuffini, S. L. New Multicomponent Forms of the Antiretroviral Nevirapine with Improved Dissolution Performance. *Cryst. Growth Des.* **2020**, 20, 688-698.

(4) Kryukova, M. A.; Sapegin, A. V.; Novikov, A. S.; Krasavin, M.; Ivanov, D. M. New Crystal Forms for Biologically Active Compounds. Part 1: Noncovalent Interactions in Adducts of Nevirapine with XB Donors. *Crystals* **2019**, 9(2), 71.

(5) Samsodien, H.; Bapoo, M.; Doms, Tl.; Harneker, Z.; Louw, A. S.; Scheepers, I. C.; Sondag, A. B.; Geldenhuys, B. FTIR, Dissolution and Anti-viral Activity of Nevirapine Co-crystals. *Pharm. Anal. Acta.* **2017**, 8(9), DOI: 10.4172/2153-2435.1000561.

(6) Sarkar, N.; Aakeroy, C. B. Evaluating hydrogen-bond propensity, hydrogen-bond coordination and hydrogen-bond energy as tools for predicting the outcome of attempted co-crystallisations. *Supramolecular Chemistry* **2019**, 32(2), 81-90.
